# Supplementary material for: First-in-Human, Open-Label, Within-Patient Controlled Study to Evaluate an Extensively Humanized Porcine Donor
Source: Research Square preprint supplement (doi:10.21203/rs.3.rs-7042454/v1), 2025-10-20
Supplement: Supplementary file 1 [file 96433995dd4dc56eb88a7cb5.docx]

**Supplementary Methods**

**Detailed information for generation SGGEP**

3KO (lacking *GGTA1*, *CAMH*, and *B4GALNT2*) pig fibroblasts were created as described in previous studies. 1,2 The specific gRNA sequence for *GGTA* is GTCGTGACCATAACCAGA; for *CMAH* is AGAAACTCCTGAACTACA; for *B4GALNT2* is AGGAAAGCTATAACTTGG. Primary skin-derived fibroblasts were simultaneously transfected with three Cas9 endonucleases (Thermofisher, USA), gRNA complex (true guide synthetic gRNA, Thermofisher, USA) specific for the *GGTA*, *CMAH*, and *B4GALNT2* genes with the Neon Transfection System (Life Technologies, Carlsbad, USA). GGTA negative cells were selected by counter-selection using streptavidin-coated magnetic beads (Dynabeads, Life Technologies) and biotin-conjugated isolectin B4 (Enzo Life Science, Farmingdale, USA) using a magnetic field. Cells without GGTA flowed out of the column due to a lack of α-Gal xenoantigen. These α-Gal-null cells were stained with fluorescein-labeled DBA (Vector Laboratories, Burlingame, USA) and Neu5GC antibody (BioLegend, San Diego, USA) plus secondary staining with FITC-labelled donkey anti-chicken IgY (Jackson ImmunoResearch, West Grove, USA), and then subjected to fluorescence-activated cell sorting. These cells did not bind DBA, a lectin commonly used to detect SDa (the protein product of *B4GALNT2*), and did not express Neu5GC (the protein product of *CAMH*). Phenotypic selection of cells without *GGTA*, *B4GALNT2*, and *CMAH* expression were used for further genome editions. Eight human genes were assigned to 3 PiggyBac vectors (System Biosciences, California, USA) by Golden Gate Assembly method. 3,4 Vector 1 carried *CD46*, *CD55*, and *CD59*; vector 2 contained the *CD39*, *THBD*, and *TFPI*; vector 3 had *CD47* and *HLA-E*. All the vectors were driven by the human elongation factor-1 alpha (*EF-1α*) promoter. The triple knockout fibroblasts were then cultured for two weeks, collected, and then transfected with three piggyBac vectors expressing multiple human proteins with the Neon Transfection System with the presence of piggyBac Transposase (System Biosciences, USA). Two days later, the cells positive for these eight human genes (3KO.8KI) were selected by fluorescence-activated cell sorting and then used for somatic cell nuclear transfer to generate SGGEP.

The procedures for oocyte collection, maturation, enucleation, microinjection, and the fusion of reconstructed oocytes were performed as described previously. 5,6 Briefly, pig ovaries were harvested from a local slaughterhouse, stored in sterile normal saline at 37 °C, and transferred to the laboratory within 1 h. Oocytes were aspirated from 3-6 mm antral follicles, and compact cumulus-oocyte complexes (COCs) were selected under a stereomicroscope. After washing, COCs were incubated in maturation medium for 42-44 h at 39 °C and 5% CO2. Enucleated oocytes and nuclear donors (3KO.8KI fibroblasts) were then prepared. A single 3KO.8KI pig fibroblast was injected into the perivitelline space of an enucleated oocyte. After fusion, fused oocytes were activated by electric pulse and then cultured at 39 °C and 5% CO2 in porcine zygote medium for 14-16 h. The cloned embryos in good condition were transplanted into the oviduct of the surrogate Bama miniature pig. Gestation of the pigs was monitored by ultrasound starting on day 28 after embryo transfer. The cloned piglets were born naturally. Before being designated as donors, the SGGEP underwent pathogen screening as described. 7. Details are shown in Supplementary Table 2.

**Immunofluorescent staining**

Paraformaldehyde (PFA)-fixed, paraffin-embedded skin specimens were prepared and sectioned into 5-μm-thick slices as described previously. 8 After deparaffinization and rehydration, the tissue sections were subjected to heat-mediated antigen retrieval, blocked with 3% bovine serum albumin (BSA) for 30 min, and then reacted with specific lectin or primary antibody overnight at 4°C. The primary antibody-treated sections were then incubated with the secondary antibody at room temperature for 1 h at 4°C. After that, the sections were washed with phosphate buffer solution (PBS) and stained with DAPI (Vector Laboratories, Burlingame, USA). Images were obtained under a fluorescence microscope (Carl Zeiss ApoTome, Jena, Germany). As mentioned above, anti-Neu5Gc, IB4-FITC, and DBA-biotin were purchased from BioLegend, Enzo Life Sciences, and Vector Laboratories, respectively. Primary antibodies against CD46, CD55, CD59, THBD, TFPI, CD39, CD47, and HLA-E, as well as the secondary antibodies, were obtained from Abcam (Cambridge, MA, Britain).

**Reagents for flow cytometry phenotyping**

Anti-Neu5Gc, IB4-FITC, fluorescein-labeled DBA, and anti-THBD-488 were acquired from BioLegend, Enzo Life Sciences, Vector Laboratories, and Abcam, respectively. Anti-CD46, anti-CD55, anti-CD59, anti-CD39, and anti-CD47 were purchased from BD Biosciences (New Jersey, USA). Anti-HLA-E and anti-TFPI were obtained from LifeSpan BioSciences (Seattle, USA).

**Human antibody binding to SGGEP skin fibroblasts**

Human serum samples from over 60 healthy donors were purchased from Innovative Research (Novi, USA) and heat-inactivated at 57°C for 30 min. Each skin fibroblast sample (5 × 105 cells/test) from SGGEP, WT pigs, or healthy human volunteers was incubated with 50% mixture of serum at 4 °C for 30 min. After washing, the cells were stained with anti-human IgG Alexa Fluor 647 (Life Technologies) or anti-human IgM Alexa FITC (Southern Biotech, Birmingham, USA) for 30 min at 4°C. The stained cells were washed and then analyzed by flow cytometry.

**Human complement-dependent toxicity assay for SGGEP skin fibroblasts**

Skin fibroblast (5 × 105 cells/test) from SGGEP, WT pigs, or healthy human volunteers were incubated with 50% mixture of human complements at 37 °C for 45 min and then stained with PI solution at 37 °C for 15 min. After washing, the cells were subjected to flow cytometry analysis to assess the proportion of the PI-stained dead cells.

**Human NK cell-mediated toxicity assay for SGGEP skin fibroblasts**

Human NK cells (Stemcell Technologies, Vancouver, Canada; 5 × 106 cells/test) were incubated with human erythroleukemic K562 cells or skin fibroblast (5 × 105 cells/test) from SGGEP, WT pigs, or healthy human volunteers. After co-incubation at 37 °C for 1 h, the cells were stained with PI and the Alexa Fluor 647-conjugated antibody against NK cell marker CD56 (BD Biosciences), followed by flow cytometry to assess the ratio of the PI-stained dead fibroblasts.

**Isolation and culture of primary KECs**

A 5 cm² section of kidney cortex was excised, minced, and then enzymatically digested using collagenase type IV (1 mg/mL) at 37 °C for 30 min. The cell suspension was filtered, and the pellet was resuspended in endothelial cell base medium as described previously. 9 Cells were plated into 0.2% gelatin pre-coated T-175 flasks. Endothelial cell growth supplement (ECGS; 100 µg/mL; Corning, New York, USA) was added to the culture. For purification, cells were stained with anti-CD31 (R&D Systems, Minneapolis, USA) for sorting CD31-positive KECs by flow cytometry. Cultures were maintained at 37 °C with 5% CO2.

**Whole-blood TAT complex formation assay**

Endothelial cells (7.5 × 103 cells per well) were plated in a 24-well-plate and cultured in endothelial cell base medium for 24 h. Fresh whole blood was collected from healthy volunteers at The First Affiliated Hospital of Nanchang University into Vacutainer tubes (BD Biosciences) containing 0.5 U/mL heparin. After washing with PBS, the collected blood (225 μL per well) was added to the cells and incubated for 40 min at 37 °C on an Orbitron plate rocker (Boekel Scientific). Non-clotted blood was transferred to Eppendorf tubes and centrifuged at 1500 × g for 10 min. The supernatant was harvested to assess the concentration of TAT using a commercial kit from Abcam. Whole blood was also centrifuged to collect the plasma for assessing baseline TAT concentration. The results were read on an Envision 2105 Multimode Plate Reader (Perkin Elmer) and TAT concentrations were determined based on a standard curve of purified human TAT complex.

**Detailed information for skin, kidney, and cardiac xenotransplantation**

For the creation of lethal skin removal models, twenty-five male cynomolgus monkeys were anesthetized with 10 mg/kg ketamine by intraperitoneal injection. Both forearms were clipped, and the volar surfaces were cleaned with 70% ethanol. The entire dorsal skin layer, encompassing the back, buttocks, and posterior legs, was excised until slight capillary bleeding was observed, removing approximately 40% of the body surface area. The swine donors were anesthetized using the same method. Before the collection of skin grafts, their skins were disinfected with povidone-iodine and rubbed with 70% ethanol. Then, split-thickness skin grafts (approximately 0.4 mm in depth) were harvested from cynomolgus monkeys or pigs using a dermatome (Humeca, Netherland). ADM was collected from the WT porcine skin. Then, the recipient cynomolgus monkeys were transplanted with the autologous, allogeneic, SGGEP xenogeneic skin grafts, or WT porcine skin-derived ADM without immunosuppression, to record the survival time during a 31-day observation period. All monkeys were euthanized on day 31 post-transplantation.

For the generation of full-thickness skin wounds, four male cynomolgus monkeys were anesthetized by intraperitoneal injection of diazepam (2.5 mg/kg) and ketamine (10 mg/kg). After shaving the monkeys, four full-thickness excisional skin wounds (3 × 3 cm) were created with a scalpel on the dorsum of each monkey. The saline-soaked gauze was used to stop bleeding. The cynomolgus monkeys were kept under general anesthesia in the prone position. Skin grafts were sutured to full-thickness wound bed in cynomolgus monkeys with 3-0 ETHILON nylon suture (Somerville, USA) by interrupted sutures. Pressure bandaging was applied and secured with protective jackets. Ceftriaxone sodium (80 mg/kg) was injected into the recipient cynomolgus monkeys by intravenous route once before and after the surgery. Rejection was defined as a 90% loss of the original graft. Photographs were captured every four days to document the gross appearance of the skin grafts. A 3-mm needle biopsy was taken at the indicated time for histological assessment or immunofluorescent staining.

For pig-to-cynomolgus monkey kidney transplantation, two male cynomolgus monkeys were chosen as recipients based on their low anti-porcine IgG and IgM levels. SGGEP and a WT Bama miniature pig (weighing about 9 kg) were used as kidney donors. Immune suppression was conducted in the recipients using a clinically used anti-CD154-based immunosuppressive regimen as previously described. 9,10 To prepare for kidney transplantation, a central venous line was inserted into the cynomolgus monkey via the internal jugular vein 2 to 7 days before the procedure. The kidney xenograft was then transplanted intraperitoneally through the midline incision, with the renal vein and artery anastomosed to the vena cava and abdominal aorta, respectively. The ureterovesical anastomosis was conducted using the Lich-Gregoir technique without a ureteral stent. Bilateral native nephrectomy was performed. Post-operative assessments included urine output, ultrasound, clinical chemistry, haematology, and protocol biopsies to monitor graft function and health as described previously. 9,10. Long-term survival is defined as the maintenance of life-supporting functions for more than three months in the NHP recipient.

For heterotopic cardiac xenotransplantation, weight-matched donor hearts were sourced from SGGEP aged 6–8 weeks. Cynomolgus monkeys were obtained as above-described. All recipients were administered an anti-CD154-based immunosuppressive regimen, consistent with the protocol employed for kidney xenotransplantation in this study. The heterotopic cardiac xenotransplantation procedure involved a midline abdominal incision in the recipient, followed by standard organ procurement of the donor heart graft and preservation with cardioplegia in a static ice bath. Graft anastomosis was achieved through an end-to-side anastomosis between the donor and recipient aorta, as well as between the donor pulmonary artery and recipient inferior vena cava. 11-13

**Detailed information on the open-label, split-wound controlled clinical study of SGGEP skin xenografts in patients with thermal burns**

Between September 29, 2024, and February 28, 2025, we recruited eligible male or female patients aged over 18 years. These patients had no potential for childbearing and experienced thermal burns affecting 3-33% of TBSA. Burn wounds require excision and temporary coverage of wound based on clinical judgement. Each patient had a sufficient area of burn wound suitable for SGGEP deployment, with no prior history of allograft or xenograft treatment. The wound site was not located on the face or hands. Patients with the following situations were excluded from the study: 1) Pregnant or lactating women; 2) Individuals previously treated with immunosuppressive regimens; 3) Patients with a known history of malignancy, drug allergies (e.g., allergy to penicillin, aminoglycosides, amphotericin), insulin-dependent diabetes, or other underlying conditions that could compromise their safety; 4) Patients with infected wounds. The clinical study was an open-label, within-patient controlled study registered with the Chinese Clinical Trial Registry (Registration number: ChiCTR2400090412; available at https://www.chictr.org.cn/showproj.html?proj=243071). This trial was conducted in adherence to Good Clinical Practice and the Declaration of Helsinki. Written informed consent was obtained from all participants.

SGGEP skin and the human alloskin were applied to adjacent wound areas in a manner to allow direct in situ comparison. SGGEP skin was cryopreserved at –80°C and underwent quality control testing and pathogen screening before transplantation. On the day of grafting, SGGEP skin, and human alloskin were trimmed to fit the wound dimensions and secured using adhesives. Photographic images of the wounds were captured at different time points, and the mean percentages of burn wound closure were measured at day 7, 14, 21, and 28 after transplantation. The primary efficacy endpoint was the quality and duration of temporary wound barrier function, assessed using POSAS. 14 Six parameters were evaluated as follows: vascularization, pigmentation, thickness, relief, pliability, surface area, and overall evaluation. Each parameter was rated on an individual scale ranging from 1 to 10. If some parameters were not assessable at all stages of the grafting process, a score of 10 was recorded. Safety was evaluated weekly by a protocol safety review team and continuously monitored by an independent data and safety monitoring board. Safety assessments involved monitoring solicited local or systemic adverse events, serious adverse events, vital signs, laboratory parameters, and the incidence of wound infection at the donor site for 4 weeks. Throughout the entire observation period, no immunosuppressants were used. The investigator determined when or whether the patient required additional autografting after the use of these grafts. Wounds outside the treatment sites were managed in accordance with the standard care protocols of the First Affiliated Hospital of Nanchang University for such injuries.

**Histological and immunostaining**

A small proportion of the autologous, allogeneic, SGGEP xenogeneic skin grafts, and WT porcine skin-derived ADM were excised from the cynomolgus monkeys at day 7, 16, 24, and 29 after transplantation. A small subset of the implanted SGGEP skin grafts and WT porcine ADM were obtained from the burn patients at day 14 and 21 after transplantation. The kidney xenografts from WT pig and SGGEP were harvested at day 5 and 447 post-transplantation, respectively. The specimens were fixed by 4% PFA, dehydrated using graded ethanol, and embedded in paraffin. 5-μm-thick sections were prepared for histological analysis by H&E staining or subjected to immunohistochemical or immunofluorescent staining for Ki67, CD31, CD34, TNF-α, IgM, IgG, or/and C4d. Glycogen deposits in the kidneys were evaluated by PAS staining, in order to detect glomerular and tubular basement membranes. The procedures for immunostaining were conducted as described above and the images were obtained under a Carl Zeiss ApoTome fluorescence microscope. Anti-Ki67, anti-CD31, anti-CD34, anti-TNF-α, anti-CD3, anti-CD68, anti-MPO, and anti-CD19 were obtained from Abclonal (Woburn, USA). Anti-IgM, anti-IgG, anti-C4d, and the secondary antibodies were purchased from Abcam.

**Decedent surveillance for porcine viruses**

To evaluate the potential transmission of porcine viruses following xenotransplantation, we conducted real-time quantitative PCR (qRT-PCR) and nested PCR to detect porcine endogenous retrovirus (PERV), porcine cytomegalovirus (PCMV), porcine circovirus (PCV1–3), and porcine lymphotropic herpesvirus (PLHV1–3) in recipient peripheral blood mononuclear cells (PBMCs) and SGGEP skin grafts. PBMCs were first isolated from recipient whole blood by Ficoll-based density gradient centrifugation, and genomic DNA was subsequently extracted using the DNA Isolation Kit for Mammalian Blood (Magen). Meanwhile, genomic DNA from transplanted skin tissue was extracted using the QIAamp DNA Mini Kit (Qiagen) according to the manufacturer’s protocol. Total RNA was extracted using the RNeasy Mini Kit (Qiagen).

For viral RNA detection, qRT-PCR assays were conducted using the FTC 3000 system from Funglyn Biotech with the PrimeTime Probe-based Gene Expression MasterMix (Yeasen). Primers and probes targeting PERV, PCMV, PCV1–3, and PLHV1–3 were designed based on previously published sequences (Supplementary Table 4). The reaction conditions included an initial denaturation at 95°C for 2 minutes, followed by 40 cycles of amplification consisting of denaturation at 95°C for 30 seconds, annealing at 60°C for 30 seconds, and extension at 72°C for 40 seconds, with a final extension at 72°C for 5 minutes. The housekeeping gene RPP30 was used as an internal control for normalization. Each reaction was performed in triplicate, and cycle threshold (Ct) values were recorded. Samples with no detectable amplification were labeled as “not detected” (n.d.). To detect PCMV, we performed nested PCR using GoTaq DNA Polymerase (Promega, M3001). In the first-round PCR, a 350 bp fragment was amplified using the forward primer F1 (ACGGGGATCGACGAGAAAG) and reverse primer R1 (CTAGACGAAAGGACATTGTTGAT) under the following cycling conditions: 95°C for 2 minutes, followed by 40 cycles of 94°C for 30 seconds, 58°C for 30 seconds, and 70°C for 40 seconds, with a final extension at 70°C for 5 minutes. The second-round nested PCR, targeting a 206 bp amplicon, was performed using the forward primer F2 (GAAGAGAAAGGAAGTGAAGG) and reverse primer R2 (GTCACCTGCTGCCTAAGC) under the following conditions: 95°C for 2 minutes, followed by 35 cycles of 94°C for 30 seconds, 54°C for 30 seconds, and 70°C for 30 seconds, with a final extension at 70°C for 5 minutes. PCR amplicons were visualized on a 1.5% agarose gel stained with ethidium bromide, and positive bands were confirmed via Sanger sequencing. To ensure the reliability of the results, multiple controls were included. Positive controls (C(+)) consisted of DNA from PERV-C-positive or PCMV-positive pigs, while negative controls (C(−)) consisted of DNA from PERV-C-negative or PCMV-negative pigs. A no-template control (NTC) containing only the PCR mastermix without DNA was used to confirm the absence of contamination.


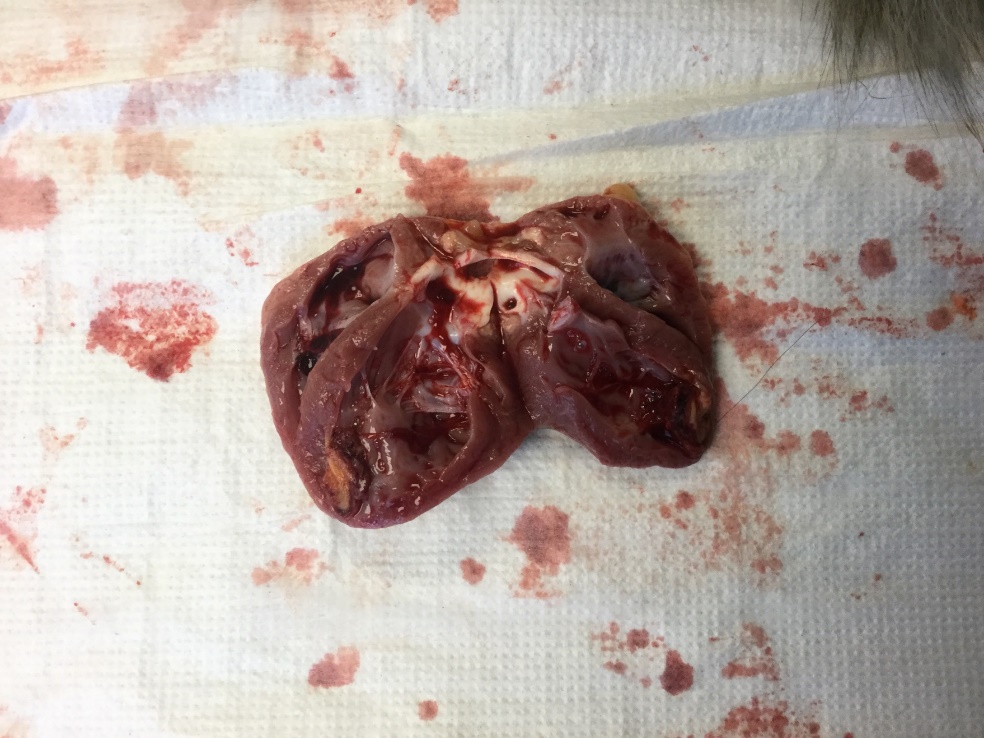


**Supplementary Fig. 1 SGGEP heterotopic heart graft exhibit a normal morphology in a cynomolgus monkey model at day 160 post-transplantation.** Gross view of SGGEP heterotopic abdominal heart graft in the recipient cynomolgus monkey at day 160 post-implantation, under clinical immunosuppression.


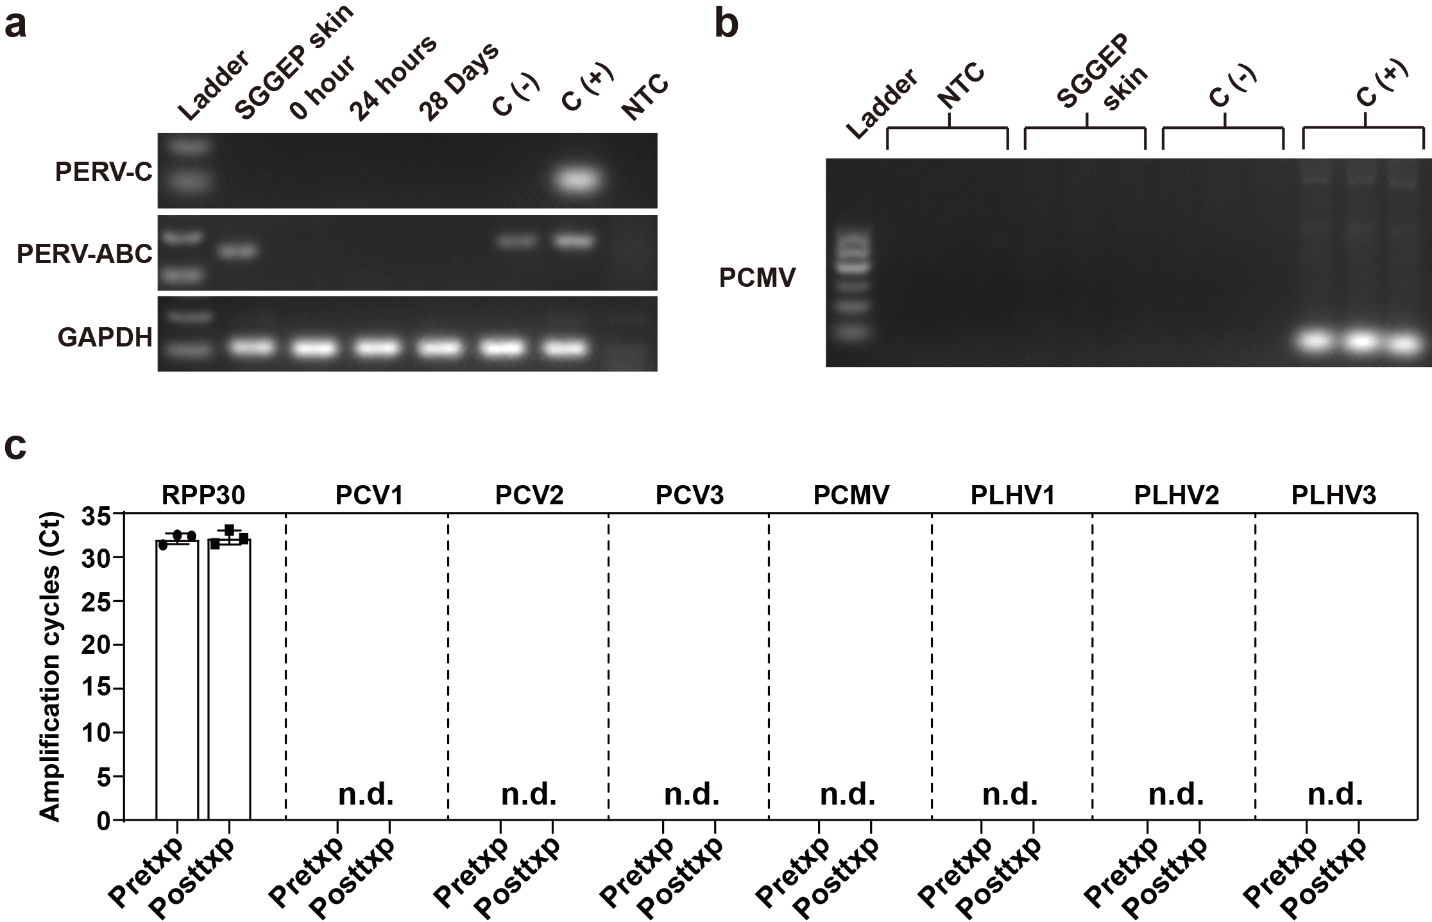


**Supplementary Fig. 2 Infectious diseases surveillance in donor pigs and xenograft skin recipients**

**a**,RT-PCR detection of porcine endogenous retroviruses (PERV-C and PERV-ABC) in peripheral blood mononuclear cells (PBMCs) isolated from xenograft recipients at 0 hours, 24 hours, and 28 days post-transplantation, as well as from donor SGGEP pig skin tissue. GAPDH served as a loading control. C (+) and C (−) were control PBMC samples derived from PERV-C-positive and PERV-C-negative pigs, respectively. The no template control (NTC) contained PCR mastermix without DNA. **b**, nested PCR detection of porcine cytomegalovirus (PCMV) in DNA extracted from donor pig skin tissue. C (−) represents a negative control (DNA from a PCMV-negative pig), while C (+) is a plasmid positive control containing 10 copies of the target sequence. **c**, RT-qPCR analysis for porcine circoviruses (PCV1–3), PCMV, and porcine lymphotropic herpesviruses (PLHV1–3) in genetically engineered donor pig skin tissue before transplantation (Pretxp) and at 21 days post-transplantation (Posttxp). RPP30 was used as a housekeeping gene control. n.d. indicates not detected. Data are presented as mean ± SD.


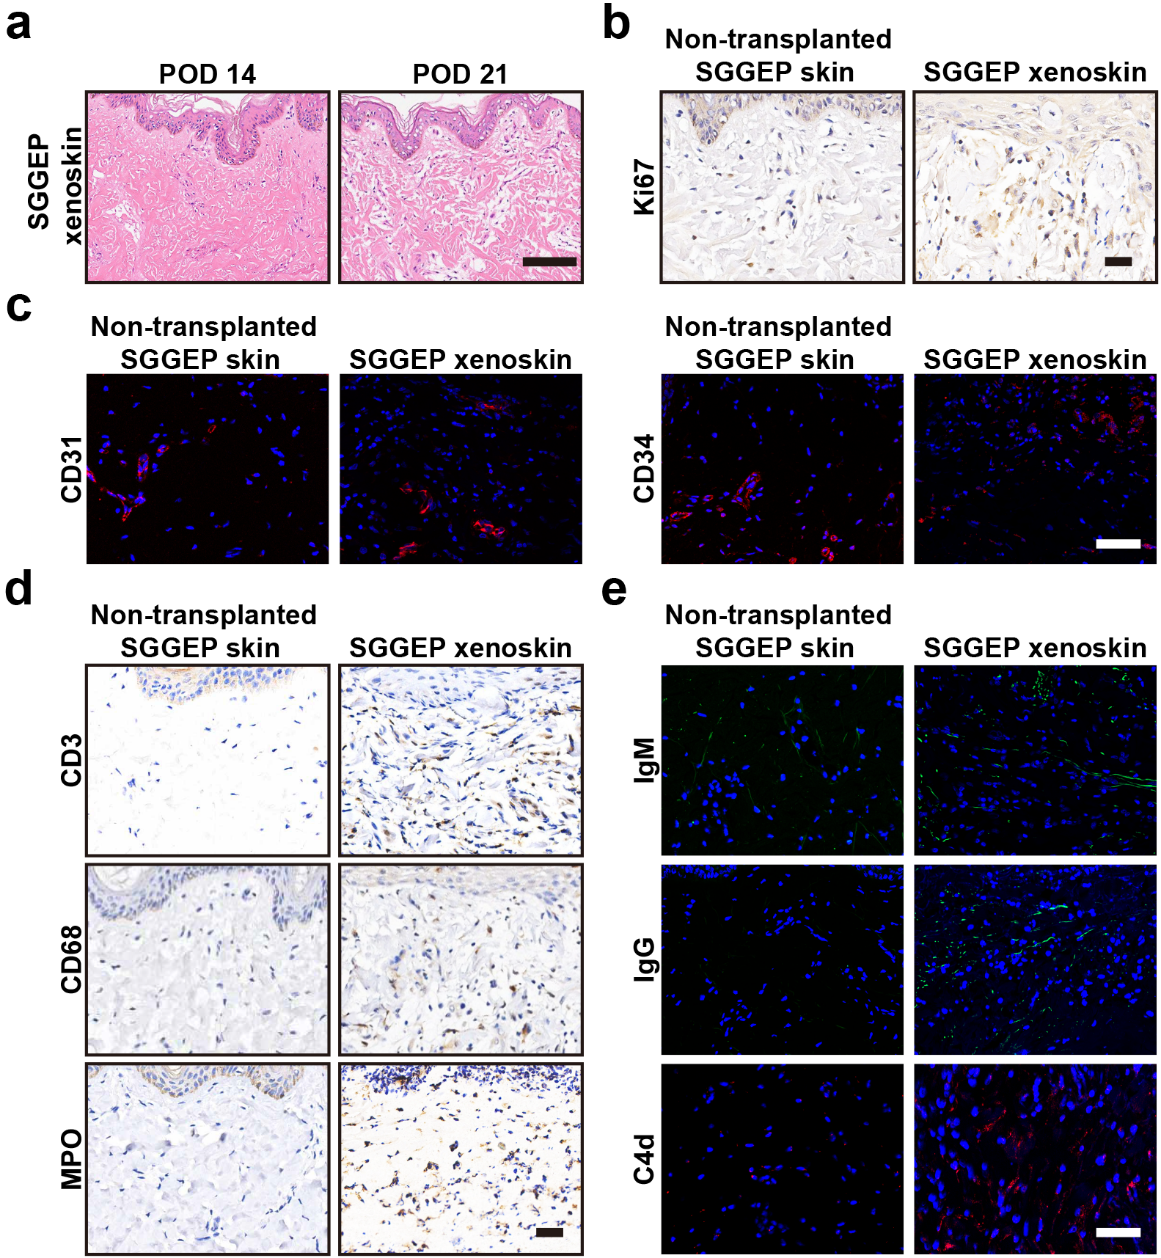


**Figure S3. Histologic, cellular, and immunologic characterization of implanted SGGEP skin xenografts in burn patients.**

**a,** H&E staining of SGGEP xenografts at postoperative days (POD) 14 and 21. Scale bar: 200 μm. **b,** Immunostaining of Ki67 for assessing active cellular proliferation within the SGGEP xenografts at day 21 post-transplantation. Scale bar: 50 μm. **c,** Immunofluorescence staining of CD31 and CD34 for confirming endothelial cell infiltration and neovascularization in the grafts. Scale bar: 50 μm. **d,** Immunostaining of CD3, CD68, and myeloperoxidase (MPO) for identifying the presence of T cells, macrophages, and neutrophils, respectively. Scale bar: 50 μm. **e,** Immunofluorescent staining of IgM, IgG, and C4d was performed to assess localized humoral immune responses within the SGGEP xenografts. Scale bar: 50 μm.

| **Supplementary Table 1 Genetic modifications of porcine for xenotransplantation** | | |
| --- | --- | --- |
| **Modified gene** | **Molecular pathways** | **Functions** |
| GGTA | Knockout of the enzyme alpha1,3-galactosyltransferase to remove Galactose-α-1,3-galactose (Gal) glycan | Reduces immunogenicity; Prevents hyperacute immunological rejections |
| B4GalNT2 | Knockout of the enzyme B4GalNT2 to remove blood group S(da) antigen |
| CMAH | Knockout of the enzyme CMP-N-acetylneuraminic acid hydroxylase to remove N-glycolylneuraminic acid (Neu5Gc) |
| CD46 | Suppress human complement activity by modulating cleavage of C3b and C4b complement deposition | Complement system negative mediators; Inhibits preformed antibodies mediated hyper-acute immunological rejections |
| CD55 | Suppression of C3 and C5 convertase enzymes and downstream complement activation |
| CD59 | Inhibition of C9 polymerization to C5b-8 complex |
| CD47 | Inhibition of macrophage cells | Anti- Inflammatory |
| HLEA | Inhibition of Natural Killer cells | Anti- Inflammatory |
| THBD | Binds human thrombin and activates Protein C via activated thrombin | Anti-Coagulation |
| CD39 | Hydrolyzes ATP and ADP |
| TFPI | Inhibit the direct activation of human prothrombin to thrombin by neutralizing the human factor Xa |

| **Supplementary Table 2 Pathogen screening of donor pig** | | | |
| --- | --- | --- | --- |
| **Test** | **samples** | **Method** | **Results** |
| Hepatitis E | Feces | Real-time PCR | Negative |
| Herpes virus gamma | Buffy coat | PCR | Negative |
| Influenza A | Nasal Swab | Real-time PCR | Negative |
| Mycoplasma hyopneumoniae | Nasal Swab | Real-time PCR | Negative |
| Porcine cytomegalovirus | Nasal Swab | Real-time PCR | Negative |
| Porcine circovirus type 2 | Serum | Real-time PCR | Negative |
| Porcine circovirus 3 | Serum | Real-time PCR | Negative |
| Porcine Epidemic Diarrhea virus (S gene) | Feces | Real-time PCR | Negative |
| Porcine deltacoronavirus | Feces | Real-time PCR | Negative |
| Transmissible Gastroenteritis virus | Feces | Real-time PCR | Negative |
| Porcine reproductive and respiratory syndrome virus (PRRSV) | Feces | Real-time PCR | Negative |
| Porcine endogenous retrovirus A | Buffy coat | PCR | Positive |
| Porcine endogenous retrovirus B | Buffy coat | PCR | Positive |
| Porcine endogenous retrovirus C | Buffy coat | PCR | Negative |

**Supplementary Table 3 Baseline characteristics of 31 burn patients who completed this clinical trial for assessing the effects of SGGEP skin xenotransplantation on burn injury.**

|  | All participants (N = 31) |
| --- | --- |
| Age (years), Median (min, max) | 34 (18-48) |
| Sex, N |  |
| Male | 20 |
| Female | 11 |
| BMI (kg/m2), Median (min, max) | 26.2 (19.0-34.0) |
| Baux Score, Median (min, max) | 45 (22-61) |
| Percent TBSA Burned, Median (min, max) | 9 (3-33) |
| Size of SGGEP skin treatment area (cm2), N |  |
| < 200 | 31 |
| Size of human alloskin treatment area (cm2), N |  |
| < 200 | 31 |

**Supplementary Table 4. Primer and Probe Sequences used in qRT-PCR**

| **Virus/primer name** | **Reference/oligonucleotide sequence** |
| --- | --- |
| porcine cytomegalovirus |  |
| PCMV F | AGATTGTTGTTCTGGGATTCCG |
| PCMV R | GTATCACTTCGTCGCAGCTC |
| PCMV P | CATCTGAGAGAGCTCGACCGCC |
| porcine circovirus 1 |  |
| PCV1 F | GCTCGCAGTATTTTGATTACCAG |
| PCV1 R | TCCTCCGATAGAGAGCTTCTAC |
| PCV1 P | AATGGTACTCCTCAACTGCTGTCCC |
| porcine circovirus 2 |  |
| PCV2 F | TGTGACTGTGGTACGCTTG |
| PCV2 R | CGTTGGAGAAGGAAAAATGGC |
| PCV2 P | CATCTTCAACACCCGCCTCTCCC |
| porcine circovirus 3 |  |
| PCV3_F | TGACGGAGACGTCGGGAAAT |
| PCV3_R | CGGTTTACCCAACCCCATCA |
| PCV3_P | GGGCGGGGTTTGCGTGATTT |
| porcine endogenous retrovirus C |  |
| PERV-C F | AAGTTTTGCCCCCATTTTAGT |
| PERV-C R | CCCCAACCCAAGGACCAG |
| PERV-C P | CTCTAACATAACTTCTGGATCAGACCC |
| porcine endogenous retrovirus ABC |  |
| PERV-ABC F | AGCTCCGGGAGGCCTACTC |
| PERV-ABC R | ACAGCCGTTGGTGTGGTCA |
| PERV-ABC probe | CCACCGTGCAGGAAACCTCGAGACT |
| porcine lymphotrophic herpesvirus 1 |  |
| PLHV1_F | CTCACCTCCAAATACAGCGA |
| PLHV1_F | GCTTGAATCGTGTGTTCCATAG |
| PLHV1_P | CTGGTCTACTGAATCGCCGCTAACAG |
| porcine lymphotrophic herpesvirus 2 |  |
| PLHV2_F | GTCACCTGCAAATACACAGG |
| PLHV2_F | GGCTTGAATCGTATGTTCCATAT |
| PLHV2_P | CTGGTCTACTGAAGCGCTGCCAATAG |
| porcine lymphotrophic herpesvirus 3 |  |
| PLHV3_F | AAGGACCCCAAAGAGGAAA |
| PLHV3_F | CTGAGGCACTGCATACTCTGT |
| PLHV3_P | TCAATTTTATGGTTCACCTTCTACCTTTCCT |
| Pig RPP30 (housekeeping) |  |
| Pig RPP30-F | GATTTGGACCTGCGAGCGG |
| Pig RPP30-R | GTAAGCGGCGTTCTCCACGA |
| Pig RPP30-P | TTCCGACCTCAAGGCGCTGCGT |

**All viral probes are: 5`6-FAM -NNNN..NNN-3`BHQ1**

**Reference:**

1. Fischer, K.*, et al.* Viable pigs after simultaneous inactivation of porcine MHC class I and three xenoreactive antigen genes GGTA1, CMAH and B4GALNT2. *Xenotransplantation* **27**, e12560 (2020).

2. Estrada, J.L.*, et al.* Evaluation of human and non-human primate antibody binding to pig cells lacking GGTA1/CMAH/beta4GalNT2 genes. *Xenotransplantation* **22**, 194-202 (2015).

3. Engler, C., Kandzia, R. & Marillonnet, S. A one pot, one step, precision cloning method with high throughput capability. *PLoS One* **3**, e3647 (2008).

4. Engler, C., Gruetzner, R., Kandzia, R. & Marillonnet, S. Golden gate shuffling: a one-pot DNA shuffling method based on type IIs restriction enzymes. *PLoS One* **4**, e5553 (2009).

5. Yao, J.*, et al.* Efficient bi-allelic gene knockout and site-specific knock-in mediated by TALENs in pigs. *Sci Rep* **4**, 6926 (2014).

6. Zheng, Q.*, et al.* Reconstitution of UCP1 using CRISPR/Cas9 in the white adipose tissue of pigs decreases fat deposition and improves thermogenic capacity. *Proc Natl Acad Sci U S A* **114**, E9474-e9482 (2017).

7. Griffith, B.P.*, et al.* Genetically Modified Porcine-to-Human Cardiac Xenotransplantation. *N Engl J Med* **387**, 35-44 (2022).

8. Rao, S.*, et al.* Extracellular vesicles from human urine-derived stem cells delay aging through the transfer of PLAU and TIMP1. *Acta Pharmaceutica Sinica B* **14**, 1166-1186 (2024).

9. Anand, R.P.*, et al.* Design and testing of a humanized porcine donor for xenotransplantation. *Nature* **622**, 393-401 (2023).

10. Firl, D.J.*, et al.* Clinical and molecular correlation defines activity of physiological pathways in life-sustaining kidney xenotransplantation. *Nat Commun* **14**, 3022 (2023).

11. Mohiuddin, M.M.*, et al.* Chimeric 2C10R4 anti-CD40 antibody therapy is critical for long-term survival of GTKO.hCD46.hTBM pig-to-primate cardiac xenograft. *Nat Commun* **7**, 11138 (2016).

12. Mohiuddin, M.M.*, et al.* B-cell depletion extends the survival of GTKO.hCD46Tg pig heart xenografts in baboons for up to 8 months. *Am J Transplant* **12**, 763-771 (2012).

13. Postrach, J., Bauer, A., Schmoeckel, M., Reichart, B. & Brenner, P. Heart xenotransplantation in primate models. *Methods Mol Biol* **885**, 155-168 (2012).

14. Draaijers, L.J.*, et al.* The patient and observer scar assessment scale: a reliable and feasible tool for scar evaluation. *Plast Reconstr Surg* **113**, 1960-1965; discussion 1966-1967 (2004).
